# Supplementary material for: GraphK-LR: Enhancing Long-read Metagenomic Binning with Read-overlap Graphs Across Microbial Kingdoms
Source: Research Square preprint supplement (doi:10.21203/rs.3.rs-7390699/v1), 2025-09-08
Supplement: Supplementary file 1 [file 97e8aa9d1b54c3b8f692ea58.docx]

**Supplementary Information**

GraphK-LR: Enhancing Long-read Metagenomic Binning with Read-overlap Graphs Across Microbial Kingdoms

Nethmi Ranasinghe, Sathsarani Aththanayaka, Jayathri Ranasinghe, Vijini Mallawaarachchi, and Damayanthi Herath

**Implementation Details:**

The source code for the experiments was implemented using Python 3.9 and run on a Linux system with Ubuntu 22.04.3 LTS, 128 GB Memory, 2 * Intel Xeon 4215R Processors, 2 * RTX A6000 48GB GPUs. Additionally, for the implementation, we used Python libraries such as Biopython for biological data processing, PyTorch Geometric for graph-based analyses, and

NetworkX for constructing read-overlap graphs.

As external tools, we used Prodigal (version 2.6.3) for gene prediction and HMMER (version 3.4) for protein domain identification, alongside MMseqs2 (version 15.6f452) for fast and sensitive Viral sequence searches. We used kmertools (version 0.1.0) to generate the coverage and composition vectors and seqtk (version 1.4-r122) to rename the reads.

For the initial binning, we used MetaBCC-LR (version 2.0), LRBinner (version 2.1), OBLR, and SemiBin2 (version 2.1), in their default settings. MiniMap2 (version 2.22-r1101) was used to align the reads with their reference genomes. The binning results were subsequently evaluated using CheckM (version 1.2.3) and GTDB-Tk (version 2.4.0).

**Datasets used:**

Mock Community Datasets

• SRR9328980: ATCC MSA-1003 Mock Microbial Community dataset for whole-genome sequencing (WGS) using PacBio Circular Consensus Sequencing (CCS) technology on the Sequel II System is a part of the study PRJNA546278. Includes genetic data from 1,056 human samples across two gene families, featuring multiple read samples to study

variations in duplicated genes.

• SRR13128014: Includes PacBio SMRT sequencing data for the ZymoBIOMICS Gut Microbiome Standard D6331, generated using the Sequel II system. Contains 21 different strains that mimic the human gut microbiome with 3 read samples (NCBI BioSample number SAMN16885726) where we utilized the sample with standard input library for this

Evaluation.

• ERP137731: This dataset contains long-read data generated from three uneven synthetic microbial communities with up to 87 genomic microbial strains, spanning 29 bacterial and archaeal phyla. It was used to evaluate the performance of third-generation sequencing in comparison with second-generation platforms and contains separate datasets for

Oxford Nanopore Technologies MinION R9 and Pacific Biosciences Sequel II. This is produced as a part of the study PRJEB5297736.

Real Dataset

• ERR2793136: This real dataset is derived from shotgun metagenomic sequencing of fecal samples from preterm infants, obtained using the MinION sequencing platform. This data was originally collected to profile the gut microbiota of healthy and ill preterm infants. This is a part of the study PRJEB2220721.

To download all the datasets: [NCBI](https://www.ncbi.nlm.nih.gov/)

**Kingdom-level information analysis:**

**Supplementary Table 01** Overview of considered microorganism kingdoms

| Kingdom | Count | Used gene type | Tool used for analyzing |
| --- | --- | --- | --- |
| Bacteria | 71 | Single-copy marker genes | HMMER hmmsearch |
| Archaea | 76 | Single-copy marker genes | HMMER hmmsearch |
| Protists | 83 | Single-copy marker genes | HMMER hmmsearch |
| Fungi | 593 | Single-copy marker genes | MMseqs2 search |
| VOG | 60250 | Orthologous group | MMseqs2 search |
| PHROG | 38880 | Orthologous group | MMseqs2 search |

**Supplementary Table 02** Download links and reference links related to kingdom level analysis

| HMMER tool | <https://github.com/EddyRivasLab/hmmer> |
| --- | --- |
| MMseqs2 | <https://github.com/soedinglab/MMseqs2> |
| Bacteria markers | <https://github.com/metagentools/MetaCoAG/blob/develop/src/metacoag/metacoag_utils/auxiliary/marker.hmm> |
| Archaea markers | <https://github.com/merenlab/anvio/blob/master/anvio/data/hmm/Archaea_76/genes.hmm.gz> |
| Protist markers | <https://github.com/merenlab/anvio/blob/master/anvio/data/hmm/Protista_83/genes.hmm.gz> |
| Fungi sequences | <https://github.com/stajichlab/FGMP/blob/master/data/593_cleanMarkers.fa> |
| VOGDB | <https://vogdb.org/> |
| PHROG DB | <https://phrogs.lmge.uca.fr/> |

For all the viruses, you can download the latest version of VOGDB through the MMseqs2 tool using one-line command (mmseqs databases VOGDB vog tmp).

**Evaluation metrics:**

In order to evaluate the performance of the binning tools used in our research, we employed several well-established metrics, including Precision, Recall, F1-score, and the Adjusted Rand Index (ARI). These metrics provide different perspectives on the quality of the binning by comparing the predicted bins with the ground truth. Each of these metrics is explained in detail below,

1. Precision

Precision quantifies the accuracy of the binning tool in assigning reads to the correct bins. Specifically, it measures the proportion of reads that have been correctly placed in a given bin compared to the total number of reads assigned to that bin by the tool. Mathematically, it is expressed as:

A higher precision value indicates that the majority of reads assigned to a particular bin truly belong there, according to the ground truth.

1. Recall

Recall measures the ability of the binning tool to correctly classify all the reads that should belong to a particular bin. It is calculated as the fraction of reads in the ground truth bins that are correctly assigned by the binning tool. The formula is:

High recall indicates that the binning tool successfully classified most of the reads into the correct bins, according to the ground truth.

1. F1 Score

The F1-score provides a single metric that balances precision and recall. It is the harmonic mean of precision and recall, allowing us to account for both false positives and false negatives in the binning process. It is calculated using the following formula:

The F1-score ranges from 0 to 1, with a higher value indicating a better balance between precision and recall. This metric is particularly useful when there is a trade-off between precision and recall.

1. ARI

The Adjusted Rand Index (ARI) is a statistical measure that quantifies the similarity between two data clusterings: the predicted bins generated by the binning tool and the ground truth bins. Unlike raw accuracy measures, ARI adjusts for chance and is robust against random label assignments. It is calculated as:

ARI ranges from 0 (indicating random assignments) to 1 (indicating a perfect match between the predicted bins and the ground truth). Values less than 0 can occur in cases where the agreement between the predicted and ground truth clusters is worse than random. In our research, ARI values were converted into percentages to facilitate easier interpretation and visualization.
